# Supplementary material for: One-step microwave synthesis of carbon dots for highly sensitive and selective detection of copper ions in aqueous solution
Source: Royal Society of Chemistry journal article supplement (doi:10.1039/c7nj05000c), 2018-01-01
Supplement: c7nj05000c1.pdf [file c7nj05000c1.pdf]

## Supplementary Information

### One-step microwave synthesis of carbon dots for highly sensitive and selective detection of copper ion in aqueous solution

Qiaoling Liu, <sup>\*a</sup> Nan Zhang, <sup>a</sup> Haoying Shi, <sup>a</sup> Wenyan Ji, <sup>a</sup> Xiaoqian Guo, <sup>a</sup> Wen Yuan,<sup>a</sup> Qin Hu <sup>b</sup>

<sup>a</sup>*Department of Chemistry, Taiyuan Normal University, Jinzhong 030619, P. R. China*

*E-mail: [liuqiaoling@tynu.edu.cn](mailto:liuqiaoling@tynu.edu.cn)*

<sup>b</sup>*Department of Chemistry, State University of New Yoke at Buffalo, Buffalo, NY14260, USA*

### Contents

1. Determination of fluorescence quantum yield
2. Supplementary figures
3. References

## 1. Determination of fluorescence quantum yield

Rhodamine B ( $\Phi=0.31$  in water) was chosen as a standard. The quantum yield of the CDs was calculated as follows. [1,2]

$$\Phi_{\text{sam}} = \Phi_{\text{ref}} \frac{I_{\text{sam}}}{I_{\text{ref}}} \cdot \frac{A_{\text{ref}}}{A_{\text{sam}}} \cdot \left(\frac{n_{\text{sam}}}{n_{\text{ref}}}\right)^2$$

Where  $\Phi$  is the fluorescence quantum yield,  $I$  is the integrated emission intensity,  $A$  is the absorbance, and  $n$  is the refractive index. The subscripts  $_{\text{sam}}$  and  $_{\text{ref}}$  stand for the sample and the reference, respectively. Herein, the CDs and Rhodamine B were dissolved in ultrapure water ( $n = 1.33$ ) and excited under 420 nm and kept the absorbance below 0.05. The results showed that  $I_{\text{sam}}$  and  $I_{\text{ref}}$  were 6846.6 and 16079.2, and  $A_{\text{sam}}$  and  $A_{\text{ref}}$  were 0.035 and 0.021, respectively.

## 2. Supplementary figures

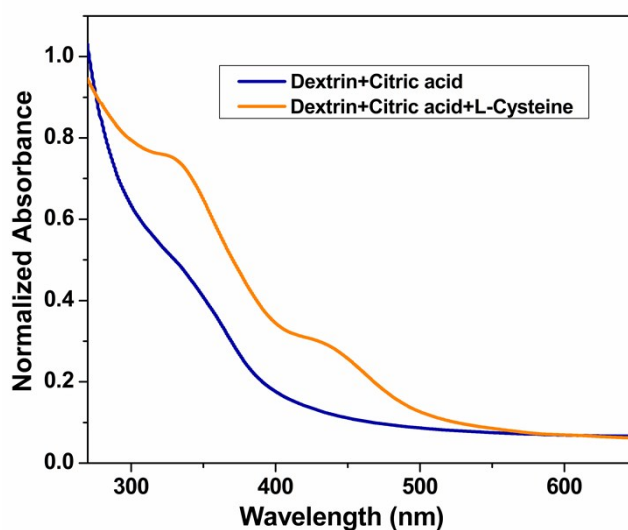

Fig.S1 The absorption spectra of undoped CDs based citric acid and dextrin as the precursors and doped CDs based citric acid, L-cysteine and dextrin as the precursors.

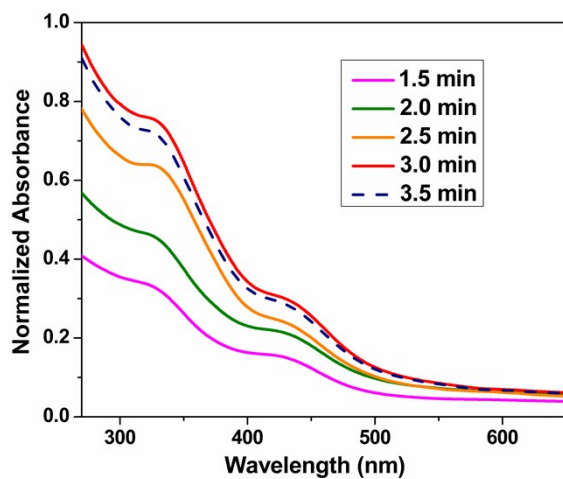

Fig. S2 The absorption spectra of the CDs with different reaction times.

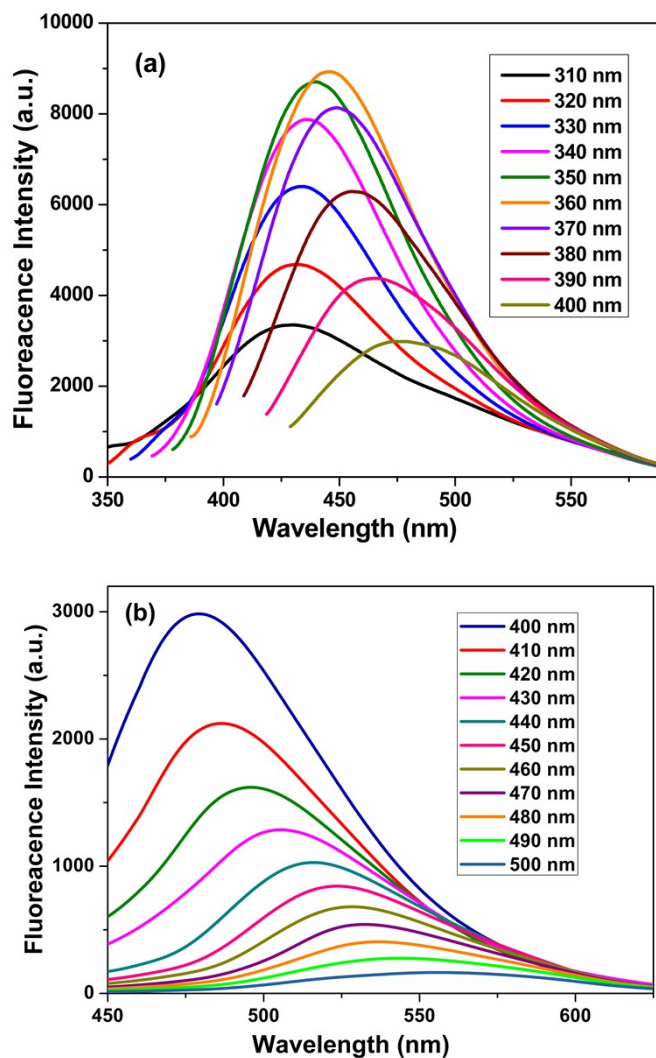

Fig. S3 The fluorescence emission spectra of the CDs with the excitation in ultraviolet region (a) and in visible region (b) with different excitation wavelengths.

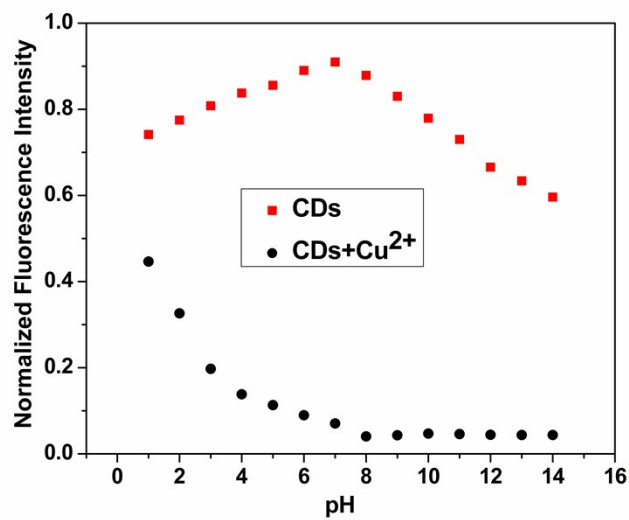

Fig.S4 Fluorescent pH titration of the free CDs and the CDs-Cu<sup>2+</sup> complex in 20 mM HEPES buffer solution (pH 1.0-14.0).

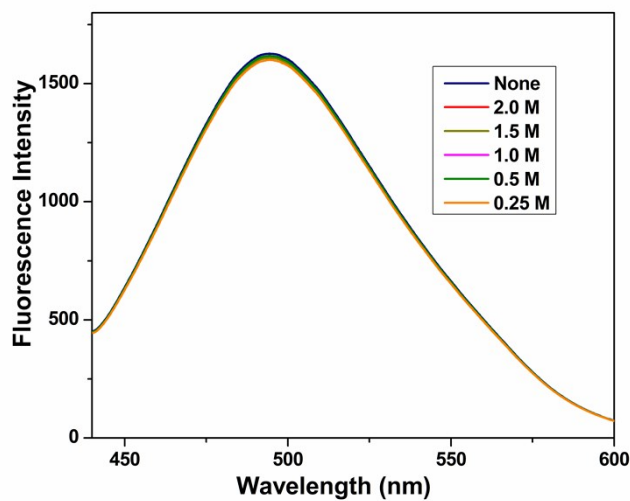

Fig.S5 The influences of the different ionic strengths (0.0-2.0 M KCl) on the fluorescence emission spectra of the CDs (0.04 mg mL<sup>-1</sup>).

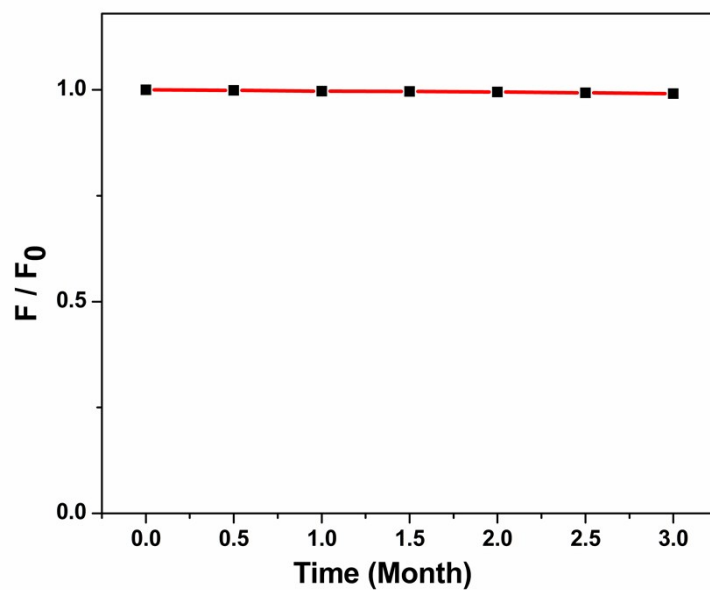

Fig.S6 Photostability of the CDs as a function of the storage times.

### 3. References

1. M. Zhang, Y. Gao, M. Li, M. Yu, F. Li, L. Li, M. Zhu, J. Zhang, T. Yi, C. Huang, *Tetrahedron Lett.* 2007, 48, 3709-3712.
2. Z. B. Qu, X. Zhou, L. Gu, R. Lan, D. Sun, D. Yu and G. Shi, *Chem. Commun.*, 2013, 49, 9830-9832.
